# Supplementary material for: Insights Into mRNA and Long Non-coding RNA Profiling RNA Sequencing in Uterus of Chickens With Pink and Blue Eggshell Colors
Source: PubMed Central journal article supplement (PMC8529033; doi:10.3389/fvets.2021.736387), 2021-10-07
Supplement: Data_Sheet_1.pdf [file Data_Sheet_1.pdf]

**Table S1. Primer sequences for the target mRNAs used for PCR amplification**

| <b>Genes</b>      | <b>Sequence</b>          | <b>Product (bp)</b> |
|-------------------|--------------------------|---------------------|
| <i>SLCO1C1</i>    | F: GTGAGAACTCGGATGTAGC   | 19                  |
|                   | R: ACGCAGAAATGTAGGTGAT   | 19                  |
| <i>SLC16A7</i>    | F: GTTTCCCAAAGCCATCACG   | 19                  |
|                   | R: CCCAGCCACACAGCAGTTC   | 19                  |
| <i>CD4</i>        | F:GACAGAAACACAGAGGGAGGAA | 22                  |
|                   | R:CCAAGATGACCGCAAACACA   | 20                  |
| <i>ST6GALNAC4</i> | F:GGGATAAAGATGCTGGTC     | 18                  |
|                   | R:GAAGAAGTAGGGCTGGTT     | 18                  |

**Table S2. The detailed information of data quality and mapping statistics**

| <b>Sample</b> | <b>Total Reads</b> | <b>Unmapped Reads</b> | <b>Unique Mapped Reads</b> | <b>Multiple Mapped reads</b> | <b>Mapping Ratio</b> |
|---------------|--------------------|-----------------------|----------------------------|------------------------------|----------------------|
| DB1           | 66933846           | 9186723 (13.73%)      | 56878313 (84.98%)          | 868810 (1.30%)               | 86.27%               |
| DB2           | 71235998           | 9324017 (13.09%)      | 61187943 (85.89%)          | 724038 (1.02%)               | 86.91%               |
| DB3           | 58969582           | 8496603 (14.41%)      | 49768877 (84.40%)          | 704102 (1.19%)               | 85.59%               |
| LB1           | 65521016           | 9011746 (13.75%)      | 55668002 (84.96%)          | 841268 (1.28%)               | 86.25%               |
| LB2           | 60752168           | 8359787 (13.76%)      | 51743367 (85.17%)          | 649014 (1.07%)               | 86.24%               |
| LB3           | 63518722           | 8335613 (13.12%)      | 54435275 (85.70%)          | 747834 (1.18%)               | 86.88%               |
| LB4           | 61232432           | 9180970 (14.99%)      | 51312050 (83.80%)          | 739412 (1.21%)               | 85.01%               |
| DP1           | 69784876           | 9774419 (14.01%)      | 59122971 (84.72%)          | 887486 (1.27%)               | 85.99%               |
| DP2           | 75253212           | 21866255<br>(29.06%)  | 52719845 (70.06%)          | 667112 (0.89%)               | 70.94%               |
| DP3           | 65389756           | 12174866<br>(18.62%)  | 52378812 (80.10%)          | 836078 (1.28%)               | 81.38%               |
| DP4           | 58000214           | 11372594<br>(19.61%)  | 45896172 (79.13%)          | 731448 (1.26%)               | 80.39%               |
| PK1           | 61140464           | 10326076<br>(16.89%)  | 50098114 (81.94%)          | 716274 (1.17%)               | 83.11%               |
| PK2           | 65872970           | 8866775 (13.46%)      | 55864711 (84.81%)          | 1141484 (1.73%)              | 86.54%               |
| PK3           | 72096974           | 9926466 (13.77%)      | 61101692 (84.75%)          | 1068816 (1.48%)              | 86.23%               |
| PK4           | 65492686           | 8981299 (13.71%)      | 55563203 (84.84%)          | 948184 (1.45%)               | 86.29%               |

DB, DP, LB and PK mean chickens producing dark blue, dark brown and greenish, light blue, and pink eggshell eggs, respectively.

**Table S3 Gene ontology with targeted genes of comparisons between chickens producing eggshell of different shell colors**

| Comparisons | Gene ontology                                             | P      | Genes                                                |
|-------------|-----------------------------------------------------------|--------|------------------------------------------------------|
| DB vs DP    | None                                                      |        |                                                      |
| DB vs LB    | P-Hindbrain tangential cell migration                     | <0.001 | <i>TCONS_00044210</i> ;<br><i>TCONS_00044211</i>     |
| DBG vs LB   | F-Phosphatidylinositol monophosphate phosphatase activity | <0.001 | <i>TCONS_00058846</i> ;<br><i>TCONS_00058849</i>     |
| PK vs DB    | None                                                      |        |                                                      |
| PK vs DP    | C-Immunoglobulin complex, circulating                     | <0.001 | <i>ENSGALT00000018840</i> ;<br><i>TCONS_00059917</i> |
|             | IgA/M immunoglobulin complex/circulating                  | <0.001 | <i>ENSGALT00000018840</i> ;<br><i>TCONS_00059917</i> |
|             | C-Polymeric IgA immunoglobulin complex                    | <0.001 | <i>ENSGALT00000018840</i> ;<br><i>TCONS_00059917</i> |
|             | C-Dimeric IgA immunoglobulin complex                      | <0.001 | <i>ENSGALT00000018840</i> ;<br><i>TCONS_00059917</i> |
|             | C-Immunoglobulin complex                                  | <0.001 | <i>ENSGALT00000018840</i> ;<br><i>TCONS_00059917</i> |
|             | F-Immunoglobulin binding                                  | <0.001 | <i>ENSGALT00000018840</i> ;<br><i>TCONS_00059917</i> |
| PK vs LB    | F-Tricarboxylic acid transmembrane transporter activity   | <0.001 | <i>ENSGALT00000009642</i> ;<br><i>TCONS_00028361</i> |
|             | F-C4-dicarboxylate transmembrane transporter activity     | <0.001 | <i>ENSGALT00000009642</i> ;<br><i>TCONS_00028361</i> |
|             | F-DNA topoisomerase activity                              | <0.001 | <i>TCONS_00022567</i> ;<br><i>TCONS_00022569</i>     |
|             | F-Phosphatidylinositol monophosphate phosphatase activity | 0.001  | <i>TCONS_00058847</i> ;<br><i>TCONS_00058849</i>     |
|             | P-Succinate transport                                     | <0.001 |                                                      |
|             | P-Tricarboxylic acid transport                            | <0.001 |                                                      |
|             | P-Rrespiratory chain complex III assembly                 | <0.001 |                                                      |

DB, DP, LB and PK mean chickens producing dark blue, dark brown and greenish, light blue, and pink eggshell eggs, respectively. C, F, and P represent Cellular Component, Molecular Function, and Biological Process, respectively.

Figure S1

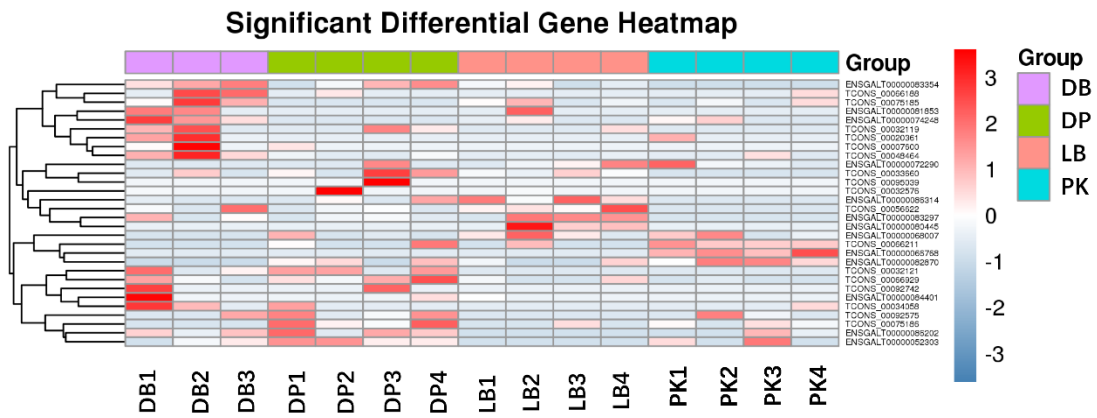

Figure S2: Heatmaps of differentially expressed lncRNA. DB, DP, LB and PK mean chickens producing dark blue, dark brown and greenish, light blue, and pink eggshell eggs, respectively.

Figure S2

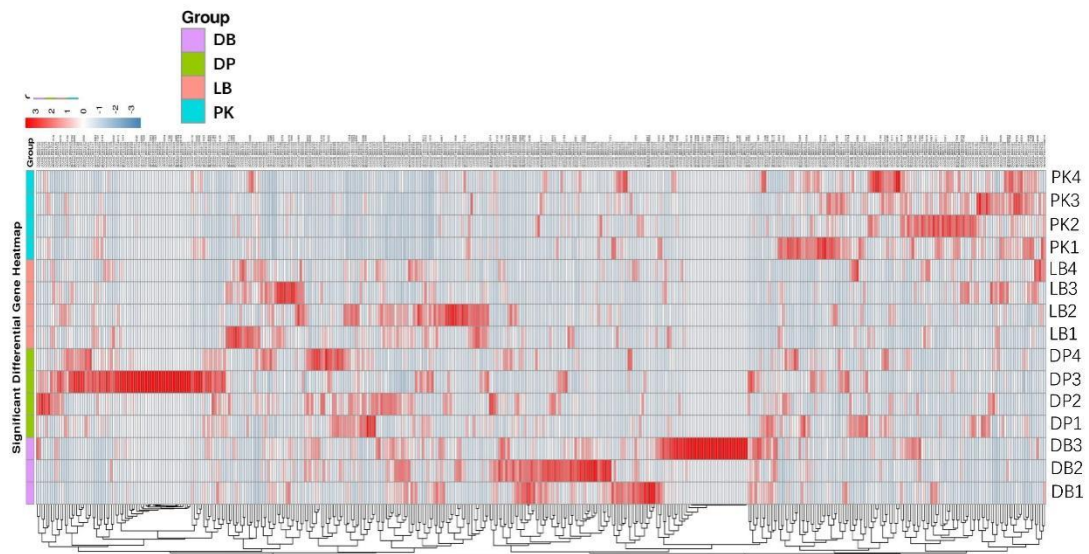

Figure S3: Heatmaps of differentially expressed mRNA. DB, DP, LB and PK mean chickens producing dark blue, dark brown and greenish, light blue, and pink eggshell eggs, respectively.

Figure S3

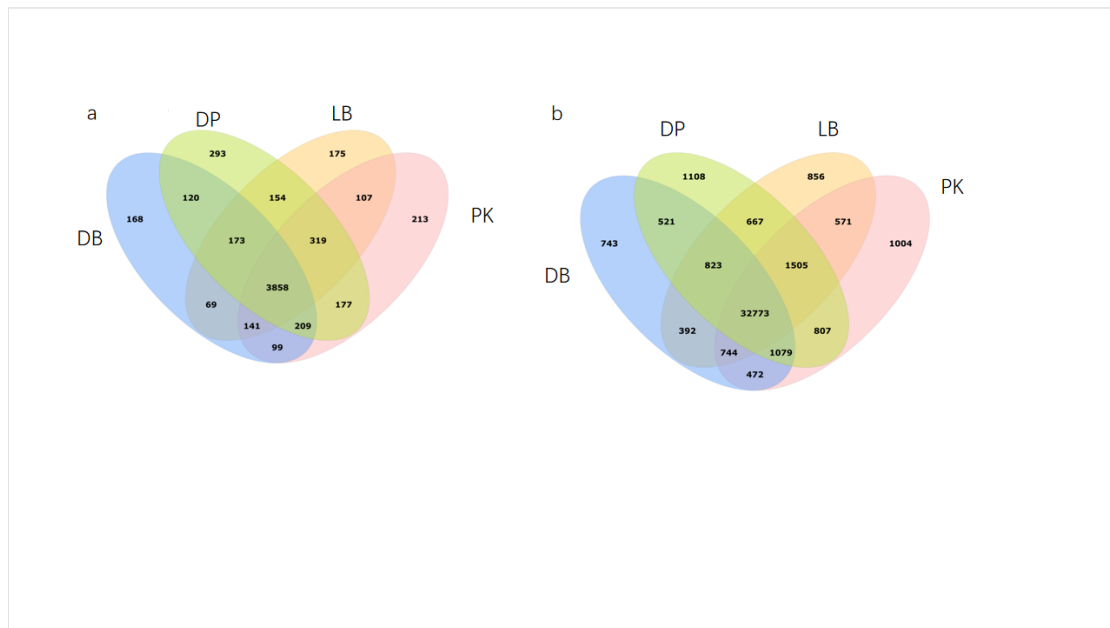

Figure S3: a represents lncRNAs and mRNA of Venn. DB, DP, LB and PK mean chickens producing dark blue, dark brown and greenish, light blue, and pink eggshell eggs, respectively.

Figure S4

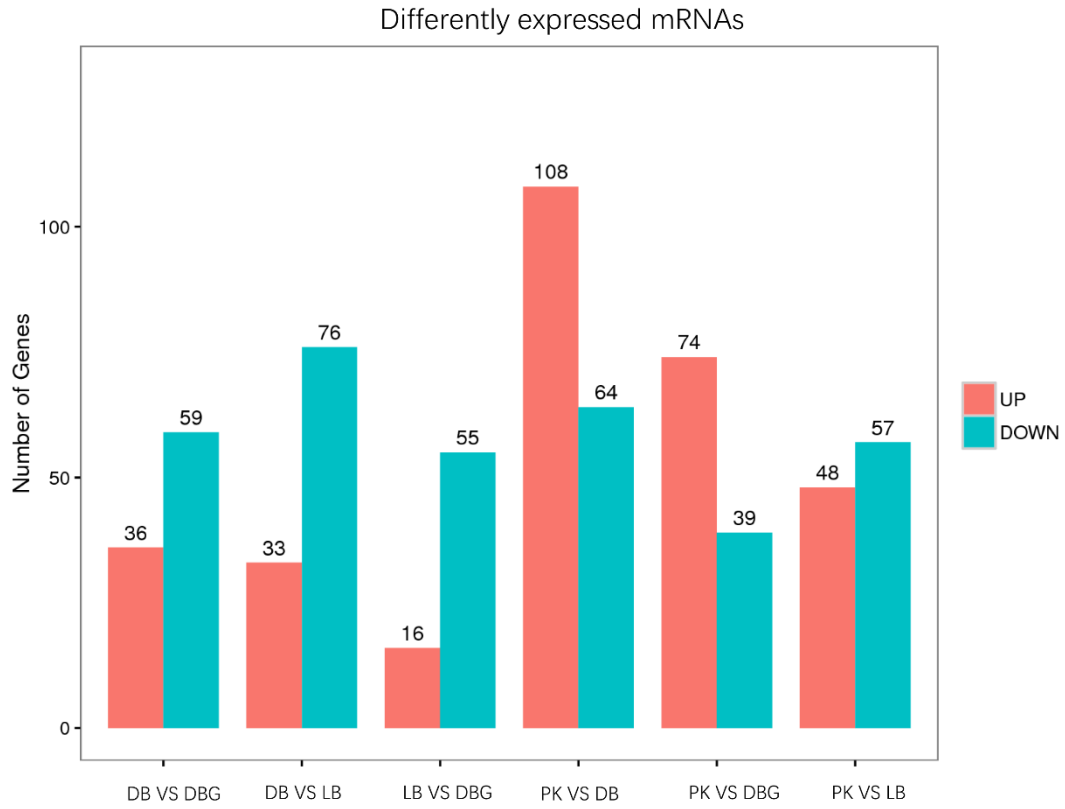

Figure S4: Differently expressed genes between comparisons. DB, DP, LB and PK mean chickens producing dark blue, dark brown and greenish, light blue, and pink eggshell eggs, respectively.
